# Supplementary material for: Epigenetic modifications in KDM lysine demethylases associate with survival of early-stage NSCLC
Source: PubMed Central journal article supplement (PMC5879927; doi:10.1186/s13148-018-0474-3), 2018-04-02
Supplement: 13148_2018_474_MOESM2_ESM.pdf [file 13148_2018_474_MOESM2_ESM.pdf]

**Table S1: Annotation of CpG sites in KDM gene family**

| Seq | Probe      | Infinium Design Type | CHR | Position  | Gene Symbol | Domain  | Relation_to CpG_Island | DMR | Enhancer | Feature_Group                              | DHS  |
|-----|------------|----------------------|-----|-----------|-------------|---------|------------------------|-----|----------|--------------------------------------------|------|
| 1   | cg00014203 | I                    | 17  | 7757969   | KDM6B       | 3'UTR   | N_Shore                |     |          |                                            |      |
| 2   | cg00031013 | II                   | 17  | 7757933   | KDM6B       | 3'UTR   | N_Shore                |     |          |                                            |      |
| 3   | cg00031896 | I                    | 12  | 122020205 | KDM2B       | TSS1500 | S_Shore                |     |          | Promoter_Associated                        |      |
| 4   | cg00062312 | II                   | 1   | 23346344  | KDM1A       | 1stExon | Island                 |     |          |                                            |      |
| 5   | cg00102920 | II                   | 6   | 18156401  | KDM1B       | 5'UTR   | S_Shore                |     |          | Promoter_Associated                        |      |
| 6   | cg00121158 | II                   | 9   | 6757826   | KDM4C       | 5'UTR   | Island                 |     |          | Promoter_Associated                        |      |
| 7   | cg00154982 | I                    | 1   | 44115597  | KDM4A       | TSS200  | N_Shore                |     |          | Promoter_Associated                        |      |
| 8   | cg00265212 | II                   | 12  | 498607    | KDM5A       | 5'UTR   | Island                 |     |          | Promoter_Associated                        |      |
| 9   | cg00435490 | II                   | 5   | 137687748 | KDM3B       | TSS1500 | N_Shore                |     |          | Promoter_Associated                        |      |
| 10  | cg00513611 | II                   | 19  | 5061205   | KDM4B       | Body    | Island                 |     |          |                                            |      |
| 11  | cg00528052 | II                   | 1   | 202777295 | KDM5B       | 1stExon | Island                 |     |          |                                            | TRUE |
| 12  | cg00529909 | II                   | 19  | 5108734   | KDM4B       | Body    | N_Shore                |     |          | Unclassified_Cell_type_specific            |      |
| 13  | cg00541565 | I                    | 1   | 23346403  | KDM1A       | 1stExon | Island                 |     |          |                                            |      |
| 14  | cg00571448 | II                   | 1   | 202776680 | KDM5B       | Body    | Island                 |     |          |                                            | TRUE |
| 15  | cg00636124 | I                    | 16  | 27215281  | KDM8        | 5'UTR   | Island                 |     |          | Promoter_Associated                        |      |
| 16  | cg00667760 | II                   | 9   | 6757146   | KDM4C       | TSS1500 | N_Shore                |     |          | Promoter_Associated                        |      |
| 17  | cg00707814 | II                   | 12  | 121893668 | KDM2B       | Body    | S_Shelf                |     |          |                                            |      |
| 18  | cg00867626 | I                    | 12  | 121905749 | KDM2B       | Body    | Island                 |     |          |                                            |      |
| 19  | cg00946598 | II                   | 1   | 44117093  | KDM4A       | 5'UTR   | S_Shore                |     |          | Promoter_Associated_<br>Cell_type_specific |      |
| 20  | cg00979347 | II                   | 1   | 44115798  | KDM4A       | 1stExon | Island                 |     |          | Promoter_Associated                        |      |
| 21  | cg01029623 | II                   | 12  | 122016779 | KDM2B       | Body    | Island                 | DMR |          |                                            | TRUE |
| 22  | cg01046511 | II                   | 17  | 7742971   | KDM6B       | TSS1500 | N_Shelf                |     | TRUE     |                                            |      |
| 23  | cg01047218 | II                   | 11  | 67007568  | KDM2A       | Body    |                        |     |          | Promoter_Associated                        |      |
| 24  | cg01068259 | II                   | 12  | 121975344 | KDM2B       | Body    | Island                 |     |          | Promoter_Associated                        |      |
| 25  | cg01098771 | I                    | 19  | 4969087   | KDM4B       | TSS200  | Island                 |     |          | Promoter_Associated                        |      |
| 26  | cg01154721 | I                    | 12  | 121881891 | KDM2B       | Body    | N_Shore                |     |          | Gene_Associated                            |      |
| 27  | cg01214587 | II                   | 12  | 121891131 | KDM2B       | Body    | Island                 |     |          |                                            |      |
| 28  | cg01504836 | I                    | 11  | 94706833  | KDM4D       | TSS200  | Island                 |     |          | Promoter_Associated                        |      |
| 29  | cg01530797 | II                   | 7   | 139875863 | KDM7A       | Body    | Island                 |     |          |                                            |      |
| 30  | cg01543795 | I                    | 16  | 27215147  | KDM8        | 5'UTR   | Island                 |     |          | Promoter_Associated                        |      |
| 31  | cg01547069 | I                    | 7   | 139877097 | KDM7A       | Body    | Island                 |     |          | Promoter_Associated                        |      |

**Table S1: Annotation of CpG sites in KDM gene family**

| Seq | Probe      | Infinium Design Type | CHR | Position  | Gene Symbol | Domain  | Relation_to CpG_Island | DMR | Enhancer | Feature_Group                          | DHS  |
|-----|------------|----------------------|-----|-----------|-------------|---------|------------------------|-----|----------|----------------------------------------|------|
| 32  | cg01640991 | I                    | 12  | 121947315 | KDM2B       | Body    |                        |     |          |                                        |      |
| 33  | cg01663745 | I                    | 11  | 94706857  | KDM4D       | 1stExon | Island                 |     |          | Promoter_Associated                    |      |
| 34  | cg01744130 | I                    | 2   | 86667850  | KDM3A       | TSS1500 | Island                 |     |          | Promoter_Associated                    | TRUE |
| 35  | cg01755539 | I                    | 16  | 27215246  | KDM8        | 5'UTR   | Island                 |     |          | Promoter_Associated                    |      |
| 36  | cg01975510 | II                   | 11  | 67017821  | KDM2A       | Body    | Island                 |     |          |                                        |      |
| 37  | cg02152982 | II                   | 2   | 86667766  | KDM3A       | TSS1500 | N_Shore                |     |          | Promoter_Associated                    | TRUE |
| 38  | cg02182114 | II                   | 7   | 139876578 | KDM7A       | TSS1500 | Island                 |     |          |                                        |      |
| 39  | cg02302043 | I                    | 19  | 4988178   | KDM4B       | 5'UTR   | S_Shore                |     | TRUE     |                                        |      |
| 40  | cg02308232 | II                   | 17  | 7742762   | KDM6B       | TSS1500 | N_Shelf                |     | TRUE     | Unclassified_Cell_type_specific        |      |
| 41  | cg02331272 | II                   | 11  | 66964208  | KDM2A       | Body    |                        |     | TRUE     |                                        |      |
| 42  | cg02340915 | I                    | 12  | 121904480 | KDM2B       | Body    | N_Shore                |     |          |                                        |      |
| 43  | cg02386983 | II                   | 2   | 86669112  | KDM3A       | 5'UTR   | Island                 |     |          |                                        |      |
| 44  | cg02411582 | II                   | 16  | 27232615  | KDM8        | 3'UTR   |                        |     |          |                                        |      |
| 45  | cg02491696 | II                   | 12  | 498417    | KDM5A       | 5'UTR   | Island                 |     |          | Promoter_Associated                    |      |
| 46  | cg02577963 | I                    | 19  | 5041570   | KDM4B       | Body    | N_Shore                |     |          | Unclassified_Cell_type_specific        |      |
| 47  | cg02590486 | II                   | 12  | 499376    | KDM5A       | TSS1500 | S_Shore                |     |          | Promoter_Associated                    |      |
| 48  | cg02606627 | I                    | 19  | 5047711   | KDM4B       | Body    | Island                 |     |          |                                        |      |
| 49  | cg02633409 | II                   | 19  | 5051110   | KDM4B       | Body    | S_Shelf                |     |          | Unclassified_Cell_type_specific        |      |
| 50  | cg02659867 | II                   | 19  | 5033098   | KDM4B       | Body    | Island                 |     |          | Unclassified                           |      |
| 51  | cg02712585 | II                   | 19  | 5142260   | KDM4B       | Body    | Island                 |     |          | Unclassified_Cell_type_specific        |      |
| 52  | cg02801993 | II                   | 19  | 5062235   | KDM4B       | Body    | S_Shore                |     |          |                                        |      |
| 53  | cg02827029 | I                    | 12  | 121890907 | KDM2B       | Body    | Island                 |     |          |                                        |      |
| 54  | cg02842850 | I                    | 19  | 5148130   | KDM4B       | Body    | Island                 |     |          |                                        | TRUE |
| 55  | cg02871891 | II                   | 16  | 27228679  | KDM8        | Body    |                        |     |          |                                        | TRUE |
| 56  | cg02903589 | II                   | 6   | 18215340  | KDM1B       | Body    |                        |     |          |                                        |      |
| 57  | cg02911492 | II                   | 11  | 67017791  | KDM2A       | Body    | Island                 |     |          |                                        |      |
| 58  | cg02950740 | II                   | 12  | 498876    | KDM5A       | TSS1500 | Island                 |     |          | Promoter_Associated                    |      |
| 59  | cg02972551 | II                   | 2   | 86668068  | KDM3A       | TSS1500 | Island                 |     |          | Promoter_Associated                    | TRUE |
| 60  | cg03037033 | I                    | 2   | 86668736  | KDM3A       | 5'UTR   | Island                 |     |          |                                        | TRUE |
| 61  | cg03101936 | II                   | 16  | 27227277  | KDM8        | Body    |                        |     |          |                                        |      |
| 62  | cg03241244 | I                    | 12  | 122017052 | KDM2B       | Body    | Island                 | DMR |          | Promoter_Associated_Cell_type_specific | TRUE |

**Table S1: Annotation of CpG sites in KDM gene family**

| Seq | Probe      | Infinium Design Type | CHR | Position  | Gene Symbol | Domain  | Relation_to CpG_Island | DMR  | Enhancer | Feature_Group                   | DHS  |
|-----|------------|----------------------|-----|-----------|-------------|---------|------------------------|------|----------|---------------------------------|------|
| 63  | cg03310779 | II                   | 19  | 5117559   | KDM4B       | Body    | N_Shore                |      |          |                                 |      |
| 64  | cg03315484 | I                    | 5   | 137688433 | KDM3B       | 1stExon | Island                 |      |          | Promoter_Associated             |      |
| 65  | cg03315649 | II                   | 19  | 5093541   | KDM4B       | Body    | Island                 |      |          |                                 |      |
| 66  | cg03358468 | II                   | 19  | 5060985   | KDM4B       | Body    | Island                 |      |          |                                 |      |
| 67  | cg03389662 | I                    | 11  | 67007586  | KDM2A       | Body    |                        |      |          | Promoter_Associated             |      |
| 68  | cg03486832 | II                   | 12  | 122019525 | KDM2B       | TSS1500 | S_Shore                | RDMR |          | Promoter_Associated             |      |
| 69  | cg03538808 | II                   | 17  | 7746830   | KDM6B       | 5'UTR   | Island                 |      |          | Promoter_Associated             |      |
| 70  | cg03556944 | II                   | 19  | 5142391   | KDM4B       | Body    | Island                 |      |          | Unclassified_Cell_type_specific |      |
| 71  | cg03587511 | II                   | 1   | 44115742  | KDM4A       | TSS200  | Island                 |      |          | Promoter_Associated             |      |
| 72  | cg03592906 | II                   | 19  | 5146141   | KDM4B       | Body    | Island                 |      |          |                                 |      |
| 73  | cg03607513 | II                   | 11  | 94707155  | KDM4D       | 1stExon | S_Shore                |      |          | Promoter_Associated             |      |
| 74  | cg03688668 | I                    | 19  | 5065905   | KDM4B       | Body    | Island                 |      |          |                                 |      |
| 75  | cg03719978 | I                    | 17  | 7758102   | KDM6B       | 3'UTR   | N_Shore                |      |          |                                 |      |
| 76  | cg03727342 | II                   | 9   | 6758683   | KDM4C       | 5'UTR   | Island                 |      |          |                                 |      |
| 77  | cg03854722 | II                   | 17  | 7757958   | KDM6B       | 3'UTR   | N_Shore                |      |          |                                 |      |
| 78  | cg04085336 | II                   | 11  | 67007785  | KDM2A       | Body    |                        |      |          | Promoter_Associated             |      |
| 79  | cg04231636 | II                   | 6   | 18186411  | KDM1B       | Body    |                        |      | TRUE     |                                 |      |
| 80  | cg04241305 | II                   | 5   | 137689053 | KDM3B       | Body    | Island                 |      |          |                                 |      |
| 81  | cg04384209 | II                   | 19  | 5029938   | KDM4B       | 5'UTR   | N_Shelf                |      |          | Unclassified                    | TRUE |
| 82  | cg04388472 | II                   | 11  | 94706739  | KDM4D       | TSS200  | Island                 |      |          | Promoter_Associated             |      |
| 83  | cg04406115 | II                   | 19  | 5065640   | KDM4B       | Body    | Island                 |      |          |                                 |      |
| 84  | cg04504182 | I                    | 1   | 202777459 | KDM5B       | 1stExon | Island                 |      |          |                                 | TRUE |
| 85  | cg04585679 | II                   | 19  | 5044863   | KDM4B       | Body    | S_Shore                |      |          | Unclassified_Cell_type_specific |      |
| 86  | cg04586041 | I                    | 12  | 121878382 | KDM2B       | Body    | N_Shore                |      |          |                                 |      |
| 87  | cg04592958 | I                    | 19  | 5138093   | KDM4B       | Body    | N_Shelf                |      |          | Unclassified_Cell_type_specific | TRUE |
| 88  | cg04615850 | II                   | 19  | 5048814   | KDM4B       | Body    | Island                 |      |          | Unclassified_Cell_type_specific |      |
| 89  | cg04682193 | II                   | 12  | 121867725 | KDM2B       | 3'UTR   |                        |      |          |                                 |      |
| 90  | cg04793821 | I                    | 2   | 86668538  | KDM3A       | 5'UTR   | Island                 |      |          | Promoter_Associated             | TRUE |
| 91  | cg05038268 | I                    | 11  | 66885281  | KDM2A       | TSS1500 | Island                 |      |          |                                 |      |
| 92  | cg05067991 | I                    | 12  | 122018586 | KDM2B       | Body    | S_Shore                |      |          |                                 | TRUE |
| 93  | cg05191700 | I                    | 5   | 137688423 | KDM3B       | 1stExon | Island                 |      |          | Promoter_Associated             |      |
| 94  | cg05295919 | II                   | 11  | 66886253  | KDM2A       | TSS1500 | Island                 |      |          | Promoter_Associated             |      |

**Table S1: Annotation of CpG sites in KDM gene family**

| Seq | Probe      | Infinium Design Type | CHR | Position  | Gene Symbol | Domain  | Relation_to CpG_Island | DMR  | Enhancer | Feature_Group       | DHS  |
|-----|------------|----------------------|-----|-----------|-------------|---------|------------------------|------|----------|---------------------|------|
| 95  | cg05545111 | II                   | 9   | 6758140   | KDM4C       | 5'UTR   | Island                 |      |          | Promoter_Associated |      |
| 96  | cg05557291 | I                    | 12  | 121958763 | KDM2B       | Body    |                        |      |          |                     |      |
| 97  | cg05708550 | II                   | 5   | 137688227 | KDM3B       | TSS200  | Island                 |      |          | Promoter_Associated |      |
| 98  | cg05713782 | I                    | 11  | 94706830  | KDM4D       | TSS200  | Island                 |      |          | Promoter_Associated |      |
| 99  | cg05722427 | II                   | 5   | 137688090 | KDM3B       | TSS200  | N_Shore                |      |          | Promoter_Associated |      |
| 100 | cg05743713 | I                    | 11  | 66885240  | KDM2A       | TSS1500 | N_Shore                |      |          |                     |      |
| 101 | cg05877783 | I                    | 19  | 5096685   | KDM4B       | Body    | Island                 |      |          |                     |      |
| 102 | cg05886813 | II                   | 1   | 44115187  | KDM4A       | TSS1500 | N_Shore                |      |          | Promoter_Associated |      |
| 103 | cg05913962 | II                   | 16  | 27214514  | KDM8        | TSS1500 | N_Shore                |      |          | Promoter_Associated |      |
| 104 | cg06024930 | I                    | 12  | 121890328 | KDM2B       | Body    | Island                 | DMR  |          |                     | TRUE |
| 105 | cg06267927 | I                    | 12  | 498162    | KDM5A       | 1stExon | Island                 |      |          | Promoter_Associated |      |
| 106 | cg06320126 | I                    | 11  | 66886141  | KDM2A       | TSS1500 | Island                 |      |          |                     |      |
| 107 | cg06329197 | II                   | 16  | 27214832  | KDM8        | 1stExon | Island                 |      |          | Promoter_Associated |      |
| 108 | cg06372176 | II                   | 17  | 7748321   | KDM6B       | 5'UTR   | Island                 |      | TRUE     | Promoter_Associated |      |
| 109 | cg06596689 | I                    | 7   | 139875956 | KDM7A       | TSS1500 | Island                 |      |          |                     |      |
| 110 | cg06615743 | II                   | 19  | 5119574   | KDM4B       | Body    | S_Shore                |      |          |                     |      |
| 111 | cg06625677 | I                    | 17  | 7745595   | KDM6B       | 5'UTR   | Island                 |      |          | Promoter_Associated |      |
| 112 | cg06627361 | II                   | 12  | 498468    | KDM5A       | 5'UTR   | Island                 |      |          | Promoter_Associated |      |
| 113 | cg06646494 | I                    | 12  | 121882415 | KDM2B       | Body    | Island                 |      |          |                     |      |
| 114 | cg06884029 | II                   | 19  | 4986305   | KDM4B       | 5'UTR   | Island                 |      |          |                     |      |
| 115 | cg06890028 | II                   | 1   | 44137602  | KDM4A       | Body    |                        |      | TRUE     |                     | TRUE |
| 116 | cg06941557 | I                    | 17  | 7757543   | KDM6B       | 3'UTR   | Island                 |      |          |                     |      |
| 117 | cg06958034 | II                   | 1   | 23346203  | KDM1A       | 1stExon | Island                 |      |          |                     |      |
| 118 | cg06996029 | I                    | 11  | 67017617  | KDM2A       | Body    | Island                 |      |          |                     |      |
| 119 | cg07020001 | II                   | 12  | 122019031 | KDM2B       | TSS200  | S_Shore                | RDMR |          | Promoter_Associated |      |
| 120 | cg07052513 | I                    | 2   | 86668451  | KDM3A       | 5'UTR   | Island                 |      |          | Promoter_Associated | TRUE |
| 121 | cg07118078 | II                   | 1   | 23345725  | KDM1A       | TSS1500 | N_Shore                |      |          | Promoter_Associated |      |
| 122 | cg07156959 | I                    | 12  | 121975669 | KDM2B       | Body    | Island                 |      |          |                     |      |
| 123 | cg07165616 | II                   | 12  | 498868    | KDM5A       | TSS1500 | Island                 |      |          | Promoter_Associated |      |
| 124 | cg07211384 | I                    | 2   | 86668246  | KDM3A       | TSS1500 | Island                 |      |          | Promoter_Associated | TRUE |
| 125 | cg07271268 | II                   | 12  | 498129    | KDM5A       | 1stExon | Island                 |      |          | Promoter_Associated |      |
| 126 | cg07283932 | I                    | 11  | 66887736  | KDM2A       | 5'UTR   | S_Shore                |      |          |                     |      |

**Table S1: Annotation of CpG sites in KDM gene family**

| Seq | Probe      | Infinium Design Type | CHR | Position  | Gene Symbol | Domain  | Relation_to CpG_Island | DMR  | Enhancer | Feature_Group       | DHS  |
|-----|------------|----------------------|-----|-----------|-------------|---------|------------------------|------|----------|---------------------|------|
| 127 | cg07361448 | II                   | 16  | 27230286  | KDM8        | Body    |                        |      |          |                     |      |
| 128 | cg07474126 | I                    | 12  | 121975243 | KDM2B       | Body    | Island                 |      |          | Promoter_Associated |      |
| 129 | cg07482916 | II                   | 17  | 7757646   | KDM6B       | 3'UTR   | Island                 |      |          |                     |      |
| 130 | cg07529210 | I                    | 12  | 122019110 | KDM2B       | TSS200  | S_Shore                | RDMR |          | Promoter_Associated |      |
| 131 | cg07584494 | I                    | 19  | 5074758   | KDM4B       | Body    | Island                 |      |          |                     |      |
| 132 | cg07741840 | II                   | 12  | 121893769 | KDM2B       | Body    | S_Shelf                |      |          |                     |      |
| 133 | cg07785945 | I                    | 1   | 23346356  | KDM1A       | 1stExon | Island                 |      |          |                     |      |
| 134 | cg07793808 | II                   | 12  | 122019006 | KDM2B       | TSS200  | S_Shore                | RDMR |          |                     |      |
| 135 | cg07801662 | II                   | 17  | 7745785   | KDM6B       | 5'UTR   | Island                 |      |          | Promoter_Associated |      |
| 136 | cg07846737 | I                    | 19  | 5068701   | KDM4B       | Body    | S_Shelf                |      |          |                     |      |
| 137 | cg08036796 | II                   | 19  | 5034282   | KDM4B       | Body    | S_Shore                |      |          |                     |      |
| 138 | cg08043998 | II                   | 12  | 121890503 | KDM2B       | Body    | Island                 |      |          |                     | TRUE |
| 139 | cg08180261 | I                    | 2   | 86668980  | KDM3A       | 5'UTR   | Island                 |      |          |                     | TRUE |
| 140 | cg08355583 | II                   | 7   | 139875917 | KDM7A       | TSS1500 | Island                 |      |          |                     |      |
| 141 | cg08461425 | II                   | 12  | 121971790 | KDM2B       | Body    | N_Shelf                |      | TRUE     |                     |      |
| 142 | cg08462360 | II                   | 1   | 44119109  | KDM4A       | Body    | S_Shelf                |      |          |                     |      |
| 143 | cg08520742 | II                   | 12  | 121882033 | KDM2B       | Body    | N_Shore                |      |          | Gene_Associated     |      |
| 144 | cg08572679 | I                    | 16  | 27214781  | KDM8        | TSS1500 | Island                 |      |          | Promoter_Associated |      |
| 145 | cg08632473 | II                   | 6   | 18221097  | KDM1B       | Body    |                        |      | TRUE     |                     |      |
| 146 | cg08701479 | I                    | 19  | 5135291   | KDM4B       | Body    | Island                 |      |          |                     |      |
| 147 | cg08836144 | II                   | 11  | 66886918  | KDM2A       | 1stExon | Island                 |      |          | Promoter_Associated |      |
| 148 | cg08840665 | I                    | 17  | 7756882   | KDM6B       | 3'UTR   | Island                 |      |          |                     |      |
| 149 | cg08915090 | I                    | 1   | 202777584 | KDM5B       | TSS200  | Island                 |      |          |                     | TRUE |
| 150 | cg09074260 | II                   | 11  | 94707049  | KDM4D       | 1stExon | Island                 |      |          | Promoter_Associated |      |
| 151 | cg09140090 | I                    | 16  | 27215225  | KDM8        | 5'UTR   | Island                 |      |          | Promoter_Associated |      |
| 152 | cg09151742 | II                   | 12  | 122018897 | KDM2B       | 5'UTR   | S_Shore                |      |          |                     |      |
| 153 | cg09175485 | II                   | 11  | 67020555  | KDM2A       | Body    | S_Shelf                |      |          | Gene_Associated     |      |
| 154 | cg09310112 | II                   | 19  | 4969989   | KDM4B       | 5'UTR   | S_Shore                |      |          |                     |      |
| 155 | cg09411874 | II                   | 12  | 121905955 | KDM2B       | Body    | Island                 |      |          |                     |      |
| 156 | cg09482780 | I                    | 17  | 7756609   | KDM6B       | Body    | Island                 |      |          |                     |      |
| 157 | cg09539800 | I                    | 7   | 139877104 | KDM7A       | Body    | Island                 |      |          | Promoter_Associated |      |
| 158 | cg09544705 | II                   | 11  | 67007628  | KDM2A       | Body    |                        |      |          | Promoter_Associated |      |

**Table S1: Annotation of CpG sites in KDM gene family**

| Seq | Probe      | Infinium Design Type | CHR | Position  | Gene Symbol | Domain  | Relation_to CpG_Island | DMR  | Enhancer | Feature_Group                          | DHS  |
|-----|------------|----------------------|-----|-----------|-------------|---------|------------------------|------|----------|----------------------------------------|------|
| 159 | cg09632858 | II                   | 16  | 27219548  | KDM8        | Body    | S_Shelf                |      |          |                                        |      |
| 160 | cg09853387 | II                   | 7   | 139877374 | KDM7A       | Body    | Island                 |      |          |                                        |      |
| 161 | cg09934706 | II                   | 19  | 5147855   | KDM4B       | Body    | Island                 |      |          | Unclassified_Cell_type_specific        |      |
| 162 | cg10124355 | II                   | 19  | 5037004   | KDM4B       | Body    | Island                 |      | TRUE     |                                        | TRUE |
| 163 | cg10208587 | II                   | 17  | 7756573   | KDM6B       | Body    | Island                 |      |          |                                        |      |
| 164 | cg10214171 | II                   | 16  | 27215034  | KDM8        | TSS1500 | Island                 |      |          | Promoter_Associated                    |      |
| 165 | cg10214350 | II                   | 17  | 7747091   | KDM6B       | 5'UTR   | Island                 |      |          | Promoter_Associated                    |      |
| 166 | cg10221365 | II                   | 16  | 27214422  | KDM8        | TSS1500 | N_Shore                |      |          | Promoter_Associated                    |      |
| 167 | cg10499166 | II                   | 1   | 23345815  | KDM1A       | TSS200  | Island                 |      |          | Promoter_Associated                    |      |
| 168 | cg10612065 | II                   | 19  | 5135544   | KDM4B       | Body    | Island                 |      |          |                                        |      |
| 169 | cg10704534 | II                   | 12  | 121882208 | KDM2B       | Body    | Island                 |      |          | Gene_Associated                        |      |
| 170 | cg10717766 | I                    | 19  | 5134118   | KDM4B       | Body    | Island                 |      |          |                                        |      |
| 171 | cg10765877 | II                   | 12  | 121973425 | KDM2B       | Body    | N_Shore                | RDMR |          | Promoter_Associated_Cell_type_specific |      |
| 172 | cg10821320 | II                   | 19  | 5151204   | KDM4B       | Body    | N_Shore                |      | TRUE     | Unclassified_Cell_type_specific        |      |
| 173 | cg10968649 | II                   | 1   | 44115804  | KDM4A       | 1stExon | Island                 |      |          | Promoter_Associated                    |      |
| 174 | cg11007366 | I                    | 6   | 18155579  | KDM1B       | TSS200  | Island                 |      |          | Promoter_Associated                    |      |
| 175 | cg11214164 | II                   | 12  | 498496    | KDM5A       | 5'UTR   | Island                 |      |          | Promoter_Associated                    |      |
| 176 | cg11221497 | I                    | 1   | 202776298 | KDM5B       | Body    | Island                 |      |          |                                        | TRUE |
| 177 | cg11225935 | II                   | 12  | 498478    | KDM5A       | 5'UTR   | Island                 |      |          | Promoter_Associated                    |      |
| 178 | cg11378778 | I                    | 19  | 5144334   | KDM4B       | Body    | Island                 |      |          |                                        |      |
| 179 | cg11637544 | II                   | 11  | 66886765  | KDM2A       | 1stExon | Island                 |      |          | Promoter_Associated                    |      |
| 180 | cg11645724 | II                   | 19  | 5072741   | KDM4B       | Body    | N_Shore                |      |          |                                        |      |
| 181 | cg11724984 | I                    | 12  | 121890864 | KDM2B       | Body    | Island                 |      |          |                                        |      |
| 182 | cg11782515 | II                   | 19  | 4986183   | KDM4B       | 5'UTR   | Island                 |      |          |                                        |      |
| 183 | cg11837965 | II                   | 19  | 5096856   | KDM4B       | Body    | Island                 |      |          |                                        |      |
| 184 | cg12069073 | II                   | 11  | 67007553  | KDM2A       | Body    |                        |      |          | Promoter_Associated                    |      |
| 185 | cg12072803 | II                   | 19  | 4968558   | KDM4B       | TSS1500 | Island                 |      |          | Promoter_Associated                    |      |
| 186 | cg12077818 | II                   | 1   | 44116508  | KDM4A       | 5'UTR   | S_Shore                |      |          | Promoter_Associated                    |      |
| 187 | cg12099191 | II                   | 19  | 5100020   | KDM4B       | Body    | S_Shelf                |      |          | Unclassified_Cell_type_specific        |      |
| 188 | cg12251659 | I                    | 12  | 122018385 | KDM2B       | TSS200  | Island                 |      |          |                                        | TRUE |
| 189 | cg12293275 | II                   | 1   | 44115487  | KDM4A       | TSS1500 | N_Shore                |      |          | Promoter_Associated                    |      |

**Table S1: Annotation of CpG sites in KDM gene family**

| Seq | Probe      | Infinium Design Type | CHR | Position  | Gene Symbol | Domain  | Relation_to CpG_Island | DMR  | Enhancer | Feature_Group                   | DHS  |
|-----|------------|----------------------|-----|-----------|-------------|---------|------------------------|------|----------|---------------------------------|------|
| 190 | cg12352601 | II                   | 12  | 121947522 | KDM2B       | Body    |                        |      |          |                                 |      |
| 191 | cg12578844 | I                    | 1   | 23346212  | KDM1A       | 1stExon | Island                 |      |          |                                 |      |
| 192 | cg12639558 | II                   | 12  | 121958832 | KDM2B       | Body    |                        |      |          |                                 |      |
| 193 | cg12800105 | II                   | 12  | 121972412 | KDM2B       | Body    | N_Shelf                | CDMR |          | Unclassified                    |      |
| 194 | cg12869958 | I                    | 11  | 67017687  | KDM2A       | Body    | Island                 |      |          |                                 |      |
| 195 | cg12872398 | II                   | 19  | 5110601   | KDM4B       | Body    | Island                 |      |          |                                 |      |
| 196 | cg12888358 | II                   | 2   | 86668281  | KDM3A       | 5'UTR   | Island                 |      |          | Promoter_Associated             | TRUE |
| 197 | cg12888660 | II                   | 12  | 122018449 | KDM2B       | TSS200  | Island                 |      |          |                                 | TRUE |
| 198 | cg13149662 | I                    | 12  | 122017211 | KDM2B       | Body    | Island                 |      |          |                                 | TRUE |
| 199 | cg13253785 | II                   | 1   | 202776269 | KDM5B       | Body    | Island                 |      |          |                                 |      |
| 200 | cg13278445 | I                    | 17  | 7745945   | KDM6B       | 5'UTR   | Island                 |      |          | Promoter_Associated             |      |
| 201 | cg13357776 | II                   | 19  | 5110616   | KDM4B       | Body    | Island                 |      |          |                                 |      |
| 202 | cg13456960 | II                   | 19  | 5139479   | KDM4B       | Body    | N_Shore                |      |          | Unclassified_Cell_type_specific | TRUE |
| 203 | cg13517826 | II                   | 19  | 5039857   | KDM4B       | Body    | Island                 |      |          |                                 |      |
| 204 | cg13559217 | I                    | 19  | 5119331   | KDM4B       | Body    | Island                 |      |          |                                 |      |
| 205 | cg13656025 | I                    | 17  | 7744978   | KDM6B       | 5'UTR   | N_Shore                |      |          | Promoter_Associated             |      |
| 206 | cg13708645 | II                   | 12  | 121974305 | KDM2B       | Body    | N_Shore                |      | TRUE     | Promoter_Associated             |      |
| 207 | cg13743500 | I                    | 9   | 6761072   | KDM4C       | 5'UTR   | S_Shelf                |      |          |                                 |      |
| 208 | cg13842202 | II                   | 9   | 7172362   | KDM4C       | Body    |                        |      | TRUE     |                                 |      |
| 209 | cg13846232 | II                   | 17  | 7752867   | KDM6B       | Body    | N_Shelf                |      |          |                                 |      |
| 210 | cg13859589 | II                   | 9   | 7148129   | KDM4C       | Body    |                        |      |          |                                 |      |
| 211 | cg13875807 | II                   | 9   | 6758935   | KDM4C       | 5'UTR   | S_Shore                |      |          |                                 |      |
| 212 | cg14010696 | II                   | 19  | 5119250   | KDM4B       | Body    | Island                 |      |          |                                 |      |
| 213 | cg14015920 | II                   | 1   | 23346770  | KDM1A       | Body    | S_Shore                |      |          |                                 |      |
| 214 | cg14041232 | II                   | 9   | 6921930   | KDM4C       | Body    |                        |      |          |                                 |      |
| 215 | cg14090211 | II                   | 19  | 5077526   | KDM4B       | Body    | S_Shore                |      |          |                                 |      |
| 216 | cg14138312 | II                   | 9   | 6869699   | KDM4C       | Body    |                        |      | TRUE     |                                 |      |
| 217 | cg14180502 | I                    | 9   | 6758546   | KDM4C       | 5'UTR   | Island                 |      |          |                                 |      |
| 218 | cg14196303 | II                   | 9   | 6757347   | KDM4C       | TSS1500 | Island                 |      |          | Promoter_Associated             |      |
| 219 | cg14381677 | II                   | 1   | 202778618 | KDM5B       | TSS1500 | N_Shore                |      |          |                                 |      |
| 220 | cg14473811 | II                   | 9   | 6757912   | KDM4C       | 5'UTR   | Island                 |      |          | Promoter_Associated             |      |

**Table S1: Annotation of CpG sites in KDM gene family**

| Seq | Probe      | Infinium Design Type | CHR | Position  | Gene Symbol | Domain  | Relation_to CpG_Island | DMR  | Enhancer | Feature_Group                   | DHS  |
|-----|------------|----------------------|-----|-----------|-------------|---------|------------------------|------|----------|---------------------------------|------|
| 221 | cg14489470 | II                   | 12  | 121880054 | KDM2B       | Body    | Island                 |      |          |                                 |      |
| 222 | cg14497348 | I                    | 9   | 6757781   | KDM4C       | 5'UTR   | Island                 |      |          | Promoter_Associated             |      |
| 223 | cg14580919 | II                   | 19  | 5141553   | KDM4B       | Body    | Island                 |      |          | Unclassified_Cell_type_specific | TRUE |
| 224 | cg14674091 | II                   | 11  | 94756993  | KDM4E       | TSS1500 |                        |      |          |                                 |      |
| 225 | cg14694038 | II                   | 19  | 5037103   | KDM4B       | Body    | Island                 |      | TRUE     |                                 | TRUE |
| 226 | cg14791922 | II                   | 19  | 5144160   | KDM4B       | Body    | Island                 |      |          | Unclassified                    |      |
| 227 | cg14804129 | I                    | 19  | 5110798   | KDM4B       | Body    | Island                 |      |          |                                 |      |
| 228 | cg14963860 | II                   | 11  | 94706164  | KDM4D       | 5'UTR   | N_Shore                |      |          | Promoter_Associated             |      |
| 229 | cg15001364 | I                    | 5   | 137688694 | KDM3B       | Body    | Island                 |      |          | Promoter_Associated             |      |
| 230 | cg15120237 | II                   | 17  | 7747620   | KDM6B       | 5'UTR   | Island                 |      | TRUE     |                                 |      |
| 231 | cg15121288 | II                   | 11  | 67007855  | KDM2A       | Body    |                        |      |          | Promoter_Associated             |      |
| 232 | cg15124342 | I                    | 6   | 18155283  | KDM1B       | TSS1500 | N_Shore                |      |          | Promoter_Associated             |      |
| 233 | cg15174682 | I                    | 19  | 5132063   | KDM4B       | Body    | N_Shore                |      | TRUE     | Unclassified_Cell_type_specific | TRUE |
| 234 | cg15213650 | II                   | 19  | 4984614   | KDM4B       | 5'UTR   | N_Shore                |      |          |                                 |      |
| 235 | cg15234492 | II                   | 12  | 122019076 | KDM2B       | TSS200  | S_Shore                | RDMR |          | Promoter_Associated             |      |
| 236 | cg15237644 | II                   | 12  | 121878287 | KDM2B       | Body    | N_Shore                |      |          |                                 |      |
| 237 | cg15316703 | I                    | 12  | 122018177 | KDM2B       | Body    | Island                 |      |          | Promoter_Associated             | TRUE |
| 238 | cg15340887 | I                    | 12  | 121904973 | KDM2B       | Body    | N_Shore                |      |          |                                 |      |
| 239 | cg15348430 | I                    | 12  | 121905538 | KDM2B       | Body    | Island                 |      |          |                                 |      |
| 240 | cg15403654 | I                    | 17  | 7747012   | KDM6B       | 5'UTR   | Island                 |      |          | Promoter_Associated             |      |
| 241 | cg15555590 | II                   | 11  | 94758366  | KDM4E       | TSS200  |                        |      |          |                                 |      |
| 242 | cg15589689 | II                   | 1   | 44170389  | KDM4A       | 3'UTR   | N_Shelf                |      |          |                                 |      |
| 243 | cg15695155 | II                   | 12  | 121973871 | KDM2B       | Body    | N_Shore                | RDMR | TRUE     |                                 |      |
| 244 | cg15695435 | II                   | 12  | 121909465 | KDM2B       | Body    | S_Shelf                |      | TRUE     |                                 |      |
| 245 | cg15789385 | II                   | 12  | 121907156 | KDM2B       | Body    | S_Shore                |      |          |                                 |      |
| 246 | cg15842967 | II                   | 11  | 67007584  | KDM2A       | Body    |                        |      |          | Promoter_Associated             |      |
| 247 | cg16004548 | II                   | 11  | 66887657  | KDM2A       | 5'UTR   | S_Shore                |      |          |                                 |      |
| 248 | cg16049335 | II                   | 17  | 7748444   | KDM6B       | 5'UTR   | S_Shore                |      |          | Promoter_Associated             |      |
| 249 | cg16320626 | I                    | 12  | 121877851 | KDM2B       | Body    | N_Shelf                |      |          |                                 |      |
| 250 | cg16617758 | I                    | 19  | 5114202   | KDM4B       | Body    | S_Shelf                |      | TRUE     |                                 |      |
| 251 | cg16636182 | I                    | 19  | 5112710   | KDM4B       | Body    | S_Shore                |      | TRUE     |                                 |      |



**Table S1: Annotation of CpG sites in KDM gene family**

| Seq | Probe      | Infinium Design Type | CHR | Position  | Gene Symbol | Domain  | Relation_to CpG_Island | DMR  | Enhancer | Feature_Group                   | DHS  |
|-----|------------|----------------------|-----|-----------|-------------|---------|------------------------|------|----------|---------------------------------|------|
| 252 | cg16673806 | I                    | 5   | 137771872 | KDM3B       | 3'UTR   |                        |      |          |                                 |      |
| 253 | cg16752029 | II                   | 16  | 27214750  | KDM8        | TSS1500 | N_Shore                |      |          | Promoter_Associated             |      |
| 254 | cg16837338 | II                   | 12  | 122018770 | KDM2B       | 1stExon | S_Shore                |      |          |                                 |      |
| 255 | cg16886828 | I                    | 19  | 5032663   | KDM4B       | 5'UTR   | Island                 |      |          | Unclassified                    |      |
| 256 | cg16957323 | II                   | 17  | 7750695   | KDM6B       | Body    | S_Shelf                |      |          |                                 |      |
| 257 | cg16993220 | I                    | 11  | 94706705  | KDM4D       | TSS200  | Island                 |      |          | Promoter_Associated             |      |
| 258 | cg17146617 | II                   | 12  | 121883333 | KDM2B       | Body    | S_Shore                |      |          |                                 |      |
| 259 | cg17169037 | II                   | 12  | 122015596 | KDM2B       | Body    | N_Shore                | RDMR | TRUE     |                                 | TRUE |
| 260 | cg17339794 | II                   | 19  | 5074224   | KDM4B       | Body    | N_Shore                |      |          | Unclassified_Cell_type_specific |      |
| 261 | cg17416338 | II                   | 19  | 5074717   | KDM4B       | Body    | Island                 |      |          |                                 |      |
| 262 | cg17452615 | II                   | 12  | 122019080 | KDM2B       | TSS200  | S_Shore                | RDMR |          | Promoter_Associated             |      |
| 263 | cg17711535 | I                    | 7   | 139877050 | KDM7A       | TSS1500 | Island                 |      |          | Promoter_Associated             |      |
| 264 | cg17767427 | II                   | 19  | 5036971   | KDM4B       | Body    | Island                 |      | TRUE     |                                 | TRUE |
| 265 | cg17773654 | II                   | 19  | 5136588   | KDM4B       | Body    | S_Shore                |      |          |                                 |      |
| 266 | cg17823829 | II                   | 1   | 202765754 | KDM5B       | Body    |                        |      | TRUE     |                                 |      |
| 267 | cg17933295 | II                   | 19  | 5076032   | KDM4B       | Body    | Island                 |      |          |                                 |      |
| 268 | cg18115693 | II                   | 19  | 4968519   | KDM4B       | TSS1500 | N_Shore                |      |          | Promoter_Associated             |      |
| 269 | cg18132081 | II                   | 11  | 66887329  | KDM2A       | 1stExon | Island                 |      |          | Promoter_Associated             |      |
| 270 | cg18247177 | II                   | 17  | 7745472   | KDM6B       | 5'UTR   | Island                 |      |          | Promoter_Associated             |      |
| 271 | cg18362538 | II                   | 19  | 5032862   | KDM4B       | 5'UTR   | Island                 |      |          |                                 |      |
| 272 | cg18473234 | II                   | 19  | 5097819   | KDM4B       | Body    | S_Shore                |      |          | Unclassified_Cell_type_specific |      |
| 273 | cg18611949 | II                   | 2   | 86668510  | KDM3A       | 5'UTR   | Island                 |      |          | Promoter_Associated             | TRUE |
| 274 | cg18682923 | II                   | 5   | 137687713 | KDM3B       | TSS1500 | N_Shore                |      |          | Promoter_Associated             |      |
| 275 | cg18795232 | I                    | 12  | 121890163 | KDM2B       | Body    | N_Shore                |      |          |                                 | TRUE |
| 276 | cg18836486 | II                   | 19  | 5070723   | KDM4B       | Body    | N_Shelf                |      |          |                                 |      |
| 277 | cg18864768 | II                   | 1   | 44170024  | KDM4A       | Body    | N_Shelf                |      |          |                                 |      |
| 278 | cg18865419 | II                   | 19  | 5064019   | KDM4B       | Body    | N_Shore                |      |          |                                 |      |
| 279 | cg19076659 | II                   | 5   | 137688057 | KDM3B       | TSS1500 | N_Shore                |      |          | Promoter_Associated             |      |
| 280 | cg19139691 | I                    | 2   | 86668469  | KDM3A       | 5'UTR   | Island                 |      |          | Promoter_Associated             | TRUE |
| 281 | cg19239104 | I                    | 19  | 5036609   | KDM4B       | Body    | N_Shore                |      |          |                                 | TRUE |
| 282 | cg19313221 | II                   | 19  | 5046567   | KDM4B       | Body    | N_Shore                |      |          |                                 | TRUE |
| 283 | cg19449286 | I                    | 17  | 7756708   | KDM6B       | Body    | Island                 |      |          |                                 |      |

**Table S1: Annotation of CpG sites in KDM gene family**

| Seq | Probe      | Infinium Design Type | CHR | Position  | Gene Symbol | Domain  | Relation_to CpG_Island | DMR  | Enhancer | Feature_Group                                          | DHS  |
|-----|------------|----------------------|-----|-----------|-------------|---------|------------------------|------|----------|--------------------------------------------------------|------|
| 284 | cg19499224 | II                   | 19  | 5146074   | KDM4B       | Body    | Island                 |      |          |                                                        |      |
| 285 | cg19608357 | I                    | 19  | 5031251   | KDM4B       | 5'UTR   | N_Shore                |      | TRUE     | Unclassified                                           |      |
| 286 | cg19725989 | I                    | 11  | 67007604  | KDM2A       | Body    |                        |      |          | Promoter_Associated                                    |      |
| 287 | cg19743044 | II                   | 1   | 44115203  | KDM4A       | TSS1500 | N_Shore                |      |          | Promoter_Associated<br>Unclassified_Cell_type_specific |      |
| 288 | cg19764940 | II                   | 19  | 5141399   | KDM4B       | Body    | Island                 |      |          | TRUE                                                   |      |
| 289 | cg19839382 | II                   | 19  | 5036857   | KDM4B       | Body    | N_Shore                |      | TRUE     |                                                        | TRUE |
| 290 | cg20055546 | I                    | 12  | 122018463 | KDM2B       | TSS200  | S_Shore                |      |          |                                                        | TRUE |
| 291 | cg20096208 | II                   | 11  | 94706512  | KDM4D       | 5'UTR   | Island                 |      |          | Promoter_Associated                                    |      |
| 292 | cg20098875 | II                   | 19  | 5093370   | KDM4B       | Body    | N_Shore                |      |          | Unclassified_Cell_type_specific                        |      |
| 293 | cg20191795 | II                   | 2   | 86668233  | KDM3A       | TSS1500 | Island                 |      |          | Promoter_Associated                                    | TRUE |
| 294 | cg20320472 | II                   | 11  | 67025026  | KDM2A       | 3'UTR   |                        |      |          |                                                        |      |
| 295 | cg20347343 | II                   | 19  | 5119355   | KDM4B       | Body    | Island                 |      |          |                                                        |      |
| 296 | cg20395646 | I                    | 12  | 121947433 | KDM2B       | Body    |                        |      |          |                                                        |      |
| 297 | cg20677365 | II                   | 6   | 18155916  | KDM1B       | TSS1500 | Island                 |      |          | Promoter_Associated                                    |      |
| 298 | cg20755408 | II                   | 12  | 498145    | KDM5A       | 1stExon | Island                 |      |          | Promoter_Associated                                    |      |
| 299 | cg20873046 | I                    | 1   | 44115663  | KDM4A       | TSS200  | Island                 |      |          | Promoter_Associated                                    |      |
| 300 | cg20878780 | I                    | 12  | 121880280 | KDM2B       | Body    | Island                 |      |          |                                                        |      |
| 301 | cg20918903 | II                   | 2   | 86668501  | KDM3A       | 5'UTR   | Island                 |      |          | Promoter_Associated                                    | TRUE |
| 302 | cg20942219 | II                   | 1   | 44141161  | KDM4A       | Body    |                        |      |          | Gene_Associated_Cell_type_specific                     |      |
| 303 | cg20951334 | II                   | 2   | 86669446  | KDM3A       | Body    | Island                 |      |          |                                                        |      |
| 304 | cg21126573 | II                   | 17  | 7755257   | KDM6B       | Body    | Island                 |      | TRUE     | Promoter_Associated                                    |      |
| 305 | cg21249371 | I                    | 12  | 122019117 | KDM2B       | TSS200  | S_Shore                | RDMR |          | Promoter_Associated                                    |      |
| 306 | cg21293464 | II                   | 11  | 66885276  | KDM2A       | TSS1500 | Island                 |      |          |                                                        |      |
| 307 | cg21451504 | I                    | 1   | 44116235  | KDM4A       | 5'UTR   | Island                 |      |          | Promoter_Associated                                    |      |
| 308 | cg21526150 | II                   | 7   | 139875415 | KDM7A       | Body    | Island                 |      |          | Promoter_Associated                                    |      |
| 309 | cg21580016 | II                   | 12  | 121887392 | KDM2B       | Body    | N_Shelf                |      |          |                                                        |      |
| 310 | cg21711868 | I                    | 11  | 66886748  | KDM2A       | 1stExon | Island                 |      |          | Promoter_Associated                                    |      |
| 311 | cg21781916 | I                    | 12  | 122018375 | KDM2B       | TSS200  | Island                 |      |          |                                                        | TRUE |
| 312 | cg21973527 | II                   | 19  | 5090962   | KDM4B       | Body    | N_Shelf                |      | TRUE     |                                                        |      |
| 313 | cg22079102 | I                    | 19  | 5061085   | KDM4B       | Body    | Island                 |      |          |                                                        |      |
| 314 | cg22094309 | II                   | 1   | 44116120  | KDM4A       | 5'UTR   | Island                 |      |          | Promoter_Associated                                    |      |
| 315 | cg22127773 | I                    | 17  | 7754785   | KDM6B       | Body    | N_Shore                |      |          | Promoter_Associated                                    |      |

**Table S1: Annotation of CpG sites in KDM gene family**

| Seq | Probe      | Infinium Design Type | CHR | Position  | Gene Symbol | Domain  | Relation_to CpG_Island | DMR | Enhancer | Feature_Group                   | DHS  |
|-----|------------|----------------------|-----|-----------|-------------|---------|------------------------|-----|----------|---------------------------------|------|
| 316 | cg22241443 | II                   | 11  | 67018220  | KDM2A       | Body    | S_Shore                |     |          |                                 |      |
| 317 | cg22404242 | II                   | 2   | 86668131  | KDM3A       | TSS1500 | Island                 |     |          | Promoter_Associated             | TRUE |
| 318 | cg22406543 | II                   | 6   | 18155584  | KDM1B       | TSS200  | Island                 |     |          | Promoter_Associated             |      |
| 319 | cg22646782 | II                   | 19  | 5152272   | KDM4B       | 3'UTR   | S_Shore                |     |          | Unclassified_Cell_type_specific |      |
| 320 | cg22997601 | II                   | 19  | 5115624   | KDM4B       | Body    | N_Shelf                |     |          |                                 |      |
| 321 | cg23023599 | II                   | 11  | 94732500  | KDM4D       | 3'UTR   |                        |     |          |                                 |      |
| 322 | cg23073439 | I                    | 6   | 18155296  | KDM1B       | TSS1500 | N_Shore                |     |          | Promoter_Associated             |      |
| 323 | cg23485436 | I                    | 19  | 5048645   | KDM4B       | Body    | Island                 |     |          | Unclassified_Cell_type_specific |      |
| 324 | cg23771088 | II                   | 12  | 121975533 | KDM2B       | Body    | Island                 |     |          | Promoter_Associated             |      |
| 325 | cg23838943 | II                   | 19  | 5049135   | KDM4B       | Body    | S_Shore                |     |          | Unclassified_Cell_type_specific |      |
| 326 | cg23839891 | I                    | 19  | 5094994   | KDM4B       | Body    | N_Shore                |     |          |                                 |      |
| 327 | cg23860886 | I                    | 6   | 18155593  | KDM1B       | TSS200  | Island                 |     |          | Promoter_Associated             |      |
| 328 | cg23877401 | I                    | 12  | 122017247 | KDM2B       | Body    | Island                 |     |          |                                 | TRUE |
| 329 | cg23879263 | II                   | 12  | 121978205 | KDM2B       | Body    | S_Shelf                |     |          |                                 |      |
| 330 | cg23972735 | I                    | 12  | 121890311 | KDM2B       | Body    | Island                 | DMR |          |                                 | TRUE |
| 331 | cg24035682 | I                    | 12  | 121958802 | KDM2B       | Body    |                        |     |          |                                 |      |
| 332 | cg24109744 | II                   | 19  | 5107661   | KDM4B       | Body    | N_Shelf                |     |          |                                 |      |
| 333 | cg24128630 | II                   | 17  | 7757287   | KDM6B       | 3'UTR   | Island                 |     |          | Unclassified_Cell_type_specific |      |
| 334 | cg24137987 | I                    | 5   | 137688255 | KDM3B       | TSS200  | Island                 |     |          | Promoter_Associated             |      |
| 335 | cg24206694 | II                   | 16  | 27214687  | KDM8        | TSS1500 | N_Shore                |     |          | Promoter_Associated             |      |
| 336 | cg24214903 | II                   | 19  | 5093659   | KDM4B       | Body    | Island                 |     |          |                                 |      |
| 337 | cg24230102 | II                   | 11  | 94760534  | KDM4E       | 3'UTR   |                        |     |          | Unclassified_Cell_type_specific |      |
| 338 | cg24236839 | II                   | 19  | 5038822   | KDM4B       | Body    | N_Shore                |     |          | TRUE                            |      |
| 339 | cg24324755 | I                    | 1   | 44115813  | KDM4A       | 1stExon | Island                 |     |          | Promoter_Associated             |      |
| 340 | cg24342628 | II                   | 6   | 18155101  | KDM1B       | TSS1500 | N_Shore                |     |          | Promoter_Associated             |      |
| 341 | cg24354901 | I                    | 1   | 202777590 | KDM5B       | TSS200  | Island                 |     |          |                                 | TRUE |
| 342 | cg24400517 | II                   | 7   | 139876520 | KDM7A       | TSS1500 | Island                 |     |          | Unclassified_Cell_type_specific |      |
| 343 | cg24450508 | I                    | 19  | 5141352   | KDM4B       | Body    | Island                 |     |          | TRUE                            |      |
| 344 | cg24462596 | I                    | 11  | 94706862  | KDM4D       | 1stExon | Island                 |     |          | Promoter_Associated             |      |
| 345 | cg24505556 | I                    | 1   | 44115737  | KDM4A       | TSS200  | Island                 |     |          | Promoter_Associated             |      |
| 346 | cg24616466 | II                   | 11  | 67007621  | KDM2A       | Body    |                        |     |          | Promoter_Associated             |      |
| 347 | cg24705286 | II                   | 16  | 27215306  | KDM8        | 1stExon | Island                 |     |          | Promoter_Associated             |      |

**Table S1: Annotation of CpG sites in KDM gene family**

| Seq | Probe      | Infinium Design Type | CHR | Position  | Gene Symbol | Domain  | Relation_to CpG_Island | DMR  | Enhancer | Feature_Group                          | DHS  |
|-----|------------|----------------------|-----|-----------|-------------|---------|------------------------|------|----------|----------------------------------------|------|
| 348 | cg24749656 | II                   | 2   | 86668528  | KDM3A       | 5'UTR   | Island                 |      |          | Promoter_Associated                    | TRUE |
| 349 | cg24776350 | I                    | 17  | 7757236   | KDM6B       | 3'UTR   | Island                 |      |          | Unclassified_Cell_type_specific        |      |
| 350 | cg24823679 | II                   | 19  | 5093491   | KDM4B       | Body    | Island                 |      |          |                                        |      |
| 351 | cg24880665 | II                   | 1   | 202772164 | KDM5B       | Body    | N_Shelf                |      |          |                                        |      |
| 352 | cg24893073 | II                   | 17  | 7742126   | KDM6B       | TSS1500 | N_Shelf                |      |          | Unclassified_Cell_type_specific        |      |
| 353 | cg24987648 | I                    | 12  | 498827    | KDM5A       | TSS1500 | Island                 |      |          | Promoter_Associated                    |      |
| 354 | cg25014247 | II                   | 12  | 122015908 | KDM2B       | Body    | N_Shore                | RDMR |          |                                        |      |
| 355 | cg25246084 | II                   | 19  | 4971487   | KDM4B       | 5'UTR   | S_Shelf                |      | TRUE     | Promoter_Associated                    | TRUE |
| 356 | cg25292628 | II                   | 9   | 6758853   | KDM4C       | 5'UTR   | Island                 |      |          |                                        |      |
| 357 | cg25312876 | I                    | 19  | 5151581   | KDM4B       | 3'UTR   | Island                 |      |          | Unclassified_Cell_type_specific        |      |
| 358 | cg25401482 | II                   | 19  | 5148023   | KDM4B       | Body    | Island                 |      |          | Unclassified_Cell_type_specific        | TRUE |
| 359 | cg25482146 | I                    | 12  | 122016415 | KDM2B       | Body    | Island                 |      |          |                                        | TRUE |
| 360 | cg25569575 | I                    | 11  | 67007811  | KDM2A       | Body    |                        |      |          | Promoter_Associated                    |      |
| 361 | cg25588826 | II                   | 17  | 7755583   | KDM6B       | Body    | Island                 |      | TRUE     | Promoter_Associated                    |      |
| 362 | cg25597833 | II                   | 11  | 66888499  | KDM2A       | 5'UTR   | S_Shore                |      |          | Promoter_Associated_Cell_type_specific |      |
| 363 | cg25716786 | II                   | 12  | 498630    | KDM5A       | TSS200  | Island                 |      |          | Promoter_Associated                    |      |
| 364 | cg25732961 | I                    | 17  | 7755877   | KDM6B       | Body    | N_Shore                |      | TRUE     | Promoter_Associated                    |      |
| 365 | cg25841161 | II                   | 1   | 44115617  | KDM4A       | TSS200  | Island                 |      |          | Promoter_Associated                    |      |
| 366 | cg25949093 | I                    | 19  | 5142198   | KDM4B       | Body    | Island                 |      |          | Unclassified_Cell_type_specific        |      |
| 367 | cg26218726 | I                    | 12  | 122018391 | KDM2B       | TSS200  | Island                 |      |          |                                        | TRUE |
| 368 | cg26314534 | I                    | 17  | 7757210   | KDM6B       | 3'UTR   | Island                 |      |          | Unclassified_Cell_type_specific        |      |
| 369 | cg26345259 | II                   | 19  | 5010347   | KDM4B       | 5'UTR   |                        |      |          |                                        |      |
| 370 | cg26509318 | II                   | 12  | 122019760 | KDM2B       | TSS1500 | S_Shore                | RDMR |          | Promoter_Associated                    |      |
| 371 | cg26662347 | II                   | 1   | 23345754  | KDM1A       | TSS200  | N_Shore                |      |          | Promoter_Associated                    |      |
| 372 | cg26759552 | II                   | 7   | 139877471 | KDM7A       | TSS1500 | Island                 |      |          |                                        |      |
| 373 | cg26800802 | II                   | 7   | 139859464 | KDM7A       | Body    |                        |      | TRUE     |                                        |      |
| 374 | cg26967415 | II                   | 17  | 7748407   | KDM6B       | 5'UTR   | Island                 |      |          | Promoter_Associated                    |      |
| 375 | cg26993500 | I                    | 12  | 121975121 | KDM2B       | Body    | Island                 |      |          | Promoter_Associated                    |      |
| 376 | cg26995224 | II                   | 12  | 121974146 | KDM2B       | Body    | N_Shore                | RDMR | TRUE     | Promoter_Associated                    |      |
| 377 | cg27118526 | I                    | 16  | 27215372  | KDM8        | 1stExon | Island                 |      |          | Promoter_Associated                    |      |
| 378 | cg27162932 | I                    | 12  | 121962881 | KDM2B       | Body    |                        |      | TRUE     |                                        |      |

**Table S1: Annotation of CpG sites in KDM gene family**

| Seq | Probe          | Infinium Design Type | CHR | Position  | Gene Symbol | Domain  | Relation_to CpG_Island | DMR | Enhancer | Feature_Group                   | DHS  |
|-----|----------------|----------------------|-----|-----------|-------------|---------|------------------------|-----|----------|---------------------------------|------|
| 379 | cg27349129     | I                    | 19  | 5080888   | KDM4B       | Body    | S_Shelf                |     |          | Unclassified_Cell_type_specific |      |
| 380 | cg27366994     | II                   | 19  | 5145824   | KDM4B       | Body    | Island                 |     |          |                                 |      |
| 381 | cg27394203     | I                    | 17  | 7752261   | KDM6B       | Body    | N_Shelf                |     |          |                                 |      |
| 382 | cg27461800     | I                    | 12  | 498354    | KDM5A       | 5'UTR   | Island                 |     |          | Promoter_Associated             |      |
| 383 | cg27531483     | I                    | 1   | 202776874 | KDM5B       | Body    | Island                 |     |          |                                 | TRUE |
| 384 | ch.11.1369160F | II                   | 11  | 66922185  | KDM2A       | Body    |                        |     |          |                                 |      |
| 385 | ch.1.1363396R  | II                   | 1   | 44168444  | KDM4A       | Body    |                        |     |          |                                 |      |
| 386 | ch.2.1916207F  | II                   | 2   | 86719269  | KDM3A       | 3'UTR   |                        |     |          |                                 |      |
| 387 | cg00109780     | II                   | 9   | 96337982  | PHF2        | TSS1500 | N_Shore                |     | NA       |                                 |      |
| 388 | cg11181577     | II                   | 9   | 96339738  | PHF2        | Body    | Island                 |     | NA       |                                 |      |
| 389 | cg13442749     | II                   | 9   | 96337681  | PHF2        | TSS1500 | N_Shore                |     | NA       |                                 |      |
| 390 | cg13787134     | II                   | 9   | 96362102  | PHF2        | Body    |                        |     | TRUE     |                                 |      |
| 391 | cg14426288     | II                   | 9   | 96440615  | PHF2        | 3'UTR   |                        |     | NA       |                                 |      |
| 392 | cg20684399     | II                   | 9   | 96338308  | PHF2        | TSS1500 | Island                 |     | NA       |                                 |      |
| 393 | F              | II                   | 9   | 96414449  | PHF2        | Body    |                        |     | NA       |                                 |      |
