# Supplementary material for: Epigenetic modifications in KDM lysine demethylases associate with survival of early-stage NSCLC
Source: PubMed Central journal article supplement (PMC5879927; doi:10.1186/s13148-018-0474-3), 2018-04-02
Supplement: 13148_2018_474_MOESM3_ESM.pdf [file 13148_2018_474_MOESM3_ESM.pdf]

**Table S2: Distributions of CpG sites in KDM genes**

| Subfamily    | Gene symbol <sup>a</sup> | Gene name             | Chromosome     | N of CpG sites |           |           |           |           |            | Total      |
|--------------|--------------------------|-----------------------|----------------|----------------|-----------|-----------|-----------|-----------|------------|------------|
|              |                          |                       |                | TSS1500        | TSS200    | 3'UTR     | 5'UTR     | 1stExon   | Body       |            |
| KDM1         | KDM1A                    | lysine demethylase 1A | 1p36.12        | 1              | 2         | 0         | 0         | 5         | 1          | 9          |
|              | KDM1B                    | lysine demethylase 1B | 6p22.3         | 4              | 3         | 0         | 1         | 0         | 1          | 11         |
| KDM2         | KDM2A                    | lysine demethylase 2A | 11q13.1        | 5              | 0         | 1         | 3         | 4         | 18         | 31         |
|              | KDM2B                    | lysine demethylase 2B | 12q24.31       | 3              | 11        | 1         | 1         | 1         | 55         | 72         |
| KDM3         | KDM3A                    | lysine demethylase 3A | 2p11.2         | 6              | 0         | 1         | 10        | 0         | 2          | 18         |
|              | KDM3B                    | lysine demethylase 3B | 5q31           | 3              | 3         | 1         | 0         | 2         | 2          | 11         |
| KDM4         | KDM4A                    | lysine demethylase 4A | 1p34.1         | 3              | 5         | 1         | 4         | 3         | 5          | 21         |
|              | KDM4B                    | lysine demethylase 4B | 19p13.3        | 2              | 1         | 2         | 11        | 0         | 78         | 94         |
|              | KDM4C                    | lysine demethylase 4C | 9p24-p23       | 2              | 0         | 0         | 9         | 0         | 4          | 15         |
|              | KDM4D                    | lysine demethylase 4D | 11q21          | 0              | 4         | 1         | 2         | 4         | 0          | 11         |
|              | KDM4E                    | lysine demethylase 4E | 11q21          | 1              | 1         | 1         | 0         | 0         | 0          | 3          |
| KDM5         | KDM5A                    | lysine demethylase 5A | 12p13.33       | 4              | 1         | 0         | 6         | 3         | 0          | 14         |
|              | KDM5B                    | lysine demethylase 5B | 1q32.1         | 1              | 2         | 0         | 0         | 2         | 6          | 11         |
|              | KDM5C <sup>b</sup>       | lysine demethylase 5C | Xp11.22-p11.21 | -              | -         | -         | -         | -         | -          | -          |
|              | KDM5D <sup>b</sup>       | lysine demethylase 5D | Yq11           | -              | -         | -         | -         | -         | -          | -          |
| KDM6         | KDM6A <sup>b</sup>       | lysine demethylase 6A | Xp11.2         | -              | -         | -         | -         | -         | -          | -          |
|              | KDM6B                    | lysine demethylase 6B | 17p13.1        | 3              | 0         | 10        | 12        | 0         | 10         | 35         |
| KDM7         | KDM7A                    | lysine demethylase 7A | 7q34           | 6              | 0         | 0         | 0         | 0         | 6          | 12         |
| -            | PHF8 <sup>b</sup>        | PHD finger protein 8  | Xp11.22        | -              | -         | -         | -         | -         | -          | -          |
| -            | PHF2                     | PHD finger protein 2  | 9q22           | 3              | 0         | 1         | 0         | 0         | 3          | 7          |
| -            | KDM8                     | lysine demethylase 8  | 16p12.1        | 6              | 0         | 1         | 4         | 3         | 4          | 18         |
| <b>Total</b> |                          |                       |                | <b>53</b>      | <b>33</b> | <b>21</b> | <b>63</b> | <b>27</b> | <b>196</b> | <b>393</b> |

TSS, transcription start site; UTR, untranslation region.

<sup>a</sup>The 21 genes are classified into KDM family (<http://www.genenames.org/cgi-bin/genefamilies/set/485>)

<sup>b</sup>not included in the initial analysis due to its location in sex chromosomes
