# Supplementary material for: Epigenetic modifications in KDM lysine demethylases associate with survival of early-stage NSCLC
Source: PubMed Central journal article supplement (PMC5879927; doi:10.1186/s13148-018-0474-3), 2018-04-02

**Figure S2. Analysis work flow under flexible criteria**

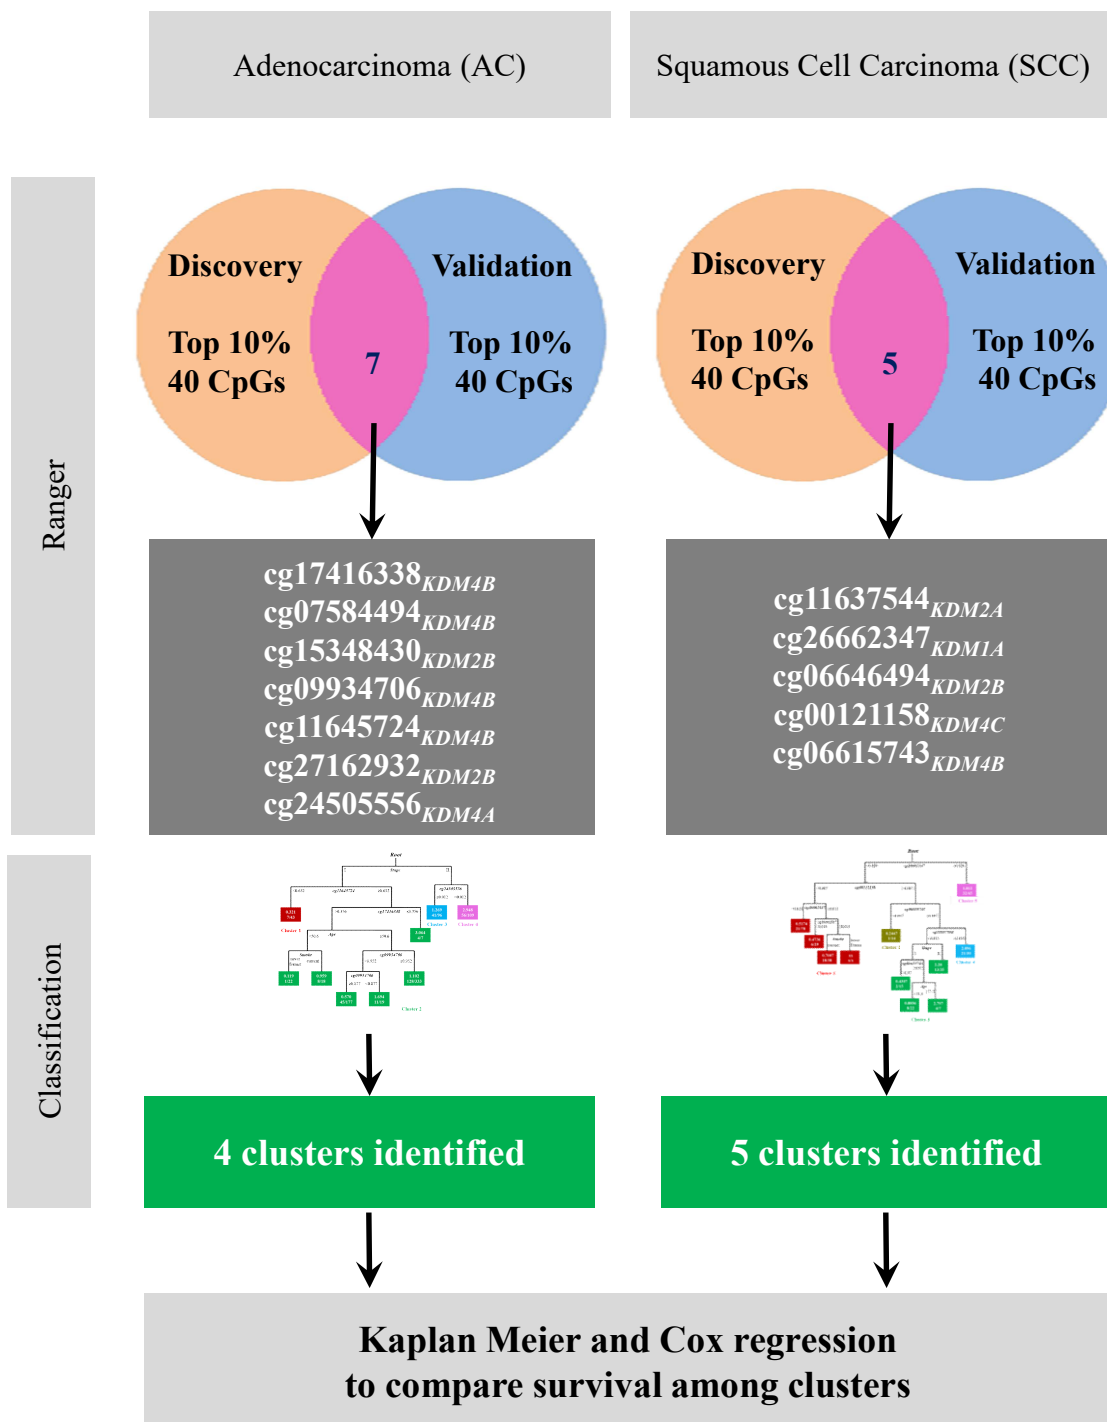

Supplement: 13148_2018_474_MOESM4_ESM.pdf [file 13148_2018_474_MOESM4_ESM.pdf]
