# Supplementary material for: Epigenetic modifications in KDM lysine demethylases associate with survival of early-stage NSCLC
Source: PubMed Central journal article supplement (PMC5879927; doi:10.1186/s13148-018-0474-3), 2018-04-02

- **Figure S3. DNA methylation probes identified by flexible criterion in SCC and their correlation with corresponding gene expression.**
- Three more sites were identified in SCC samples using more flexible criterion: cg06646494 in *KDM2B*, cg00121158 in *KDM4C*, cg06615743 in *KDM4B*. A-B shows cg00121158 and cg06615743 and their correlation with corresponding gene expression.

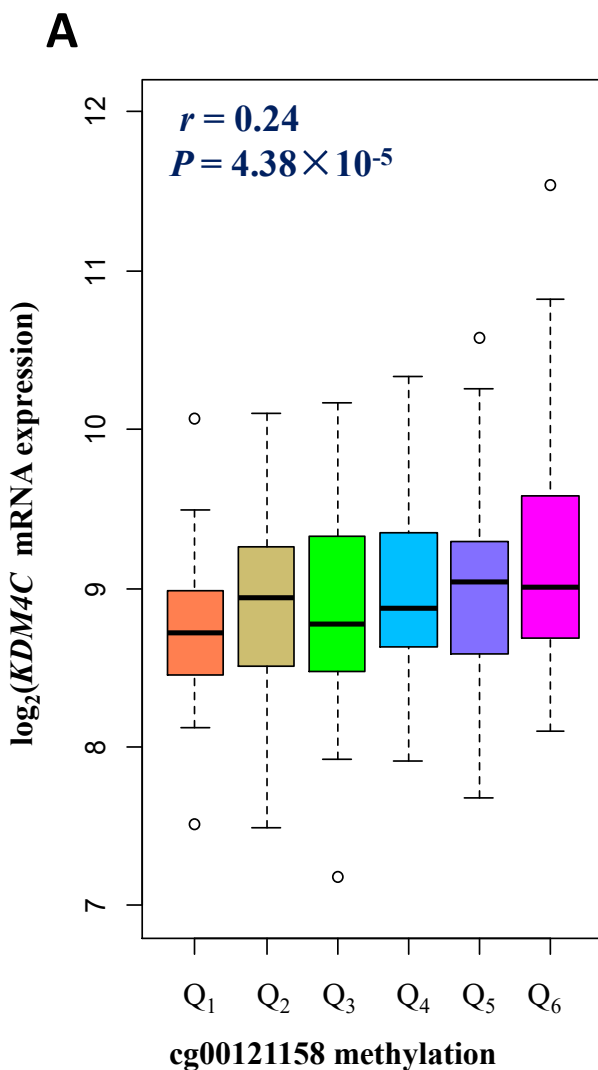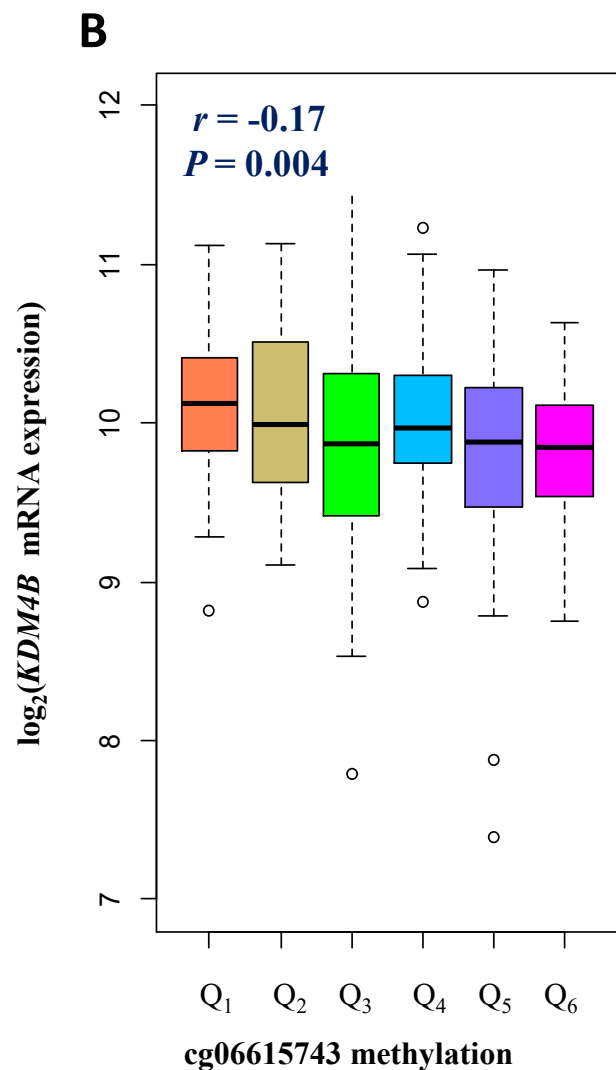

Supplement: 13148_2018_474_MOESM5_ESM.pdf [file 13148_2018_474_MOESM5_ESM.pdf]
